# Supplementary material for: Targeted microRNA Profiling Reveals That Exendin-4 Modulates the Expression of Several microRNAs To Reduce Steatosis in HepG2 Cells
Source: Preprints.org preprint supplement (doi:10.20944/preprints202306.0795.v1), 2023-06-12
Supplement: Supplementary file 1 [file supplementary]

Article

Targeted microRNA profiling reveals that Exendin-4 modulates the expression of several microRNAs to reduce steatosis in HepG2 cells

| **Citation:** To be added by editorial staff during production.  Academic Editor: Firstname Lastname  Received: date  Revised: date  Accepted: date  Published: date  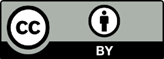  **Copyright:** © 2023 by the authors. Submitted for possible open access publication under the terms and conditions of the Creative Commons Attribution (CC BY) license (https://creativecommons.org/licenses/by/4.0/). |
| --- |

Olfa Khalifa1, Khalid Ouararhni2, Khaoula Errafii3, Nehad M. Alajez4,5, Abdelilah Arredouani 1,5*

1 Diabetes Research Center, Qatar Biomedical Research Institute, Hamad Bin Khalifa University, Qatar Foundation, Doha, Qatar.

2 Genomics Core Facility, Qatar Biomedical Research Institute, Hamad Bin Khalifa University, Qatar Foundation, Doha, Qatar.

3 African Genome Center, Mohammed VI Polytechnic University (UM6P), Ben Guerir 43151, Morocco.

4 Translational Cancer and Immunity Center Qatar Biomedical Research Institute, Hamad Bin Khalifa University, Qatar Foundation, Doha, Qatar.

5 College of Health & Life Sciences, Hamad Bin Khalifa University Qatar Foundation, Doha, Qatar.

* Corresponding author: [aarredouani@hbku.edu.qa](mailto:aarredouani@hbku.edu.qa)

Qatar Biomedical Research Institute

Hamad Bin Khalifa University

PO Box: 34110

Tel: +974 445 42947

Fax: +974 445 41770

Doha, Qatar

**Abstract:** Excess hepatic lipid accumulation is the hallmark of non-alcoholic fatty liver disease (NAFLD), for which no medication is currently approved. However, Glucagon-Like Peptide-1 Receptor Agonists (GLP-1RAs), already approved for treating type 2 diabetes, have lately emerged as possible treatments. Herein we aimed to investigate how the GLP-1RA Exendin-4 (Ex-4) affects the microRNA (miRNAs) expression profile using an in vitro model of steatosis. Total RNA, including miRNAs, was isolated from control, steatotic, and Ex-4-treated steatotic cells and used for probing a panel of 799 highly curated miRNAs using NanoString technology. Enrichment pathway analysis was used to find the signaling pathways and cellular functions associated with the differentially expressed miRNAs. Our data shows that Ex-4 reversed the expression of a set of miRNAs. Functional enrichment analysis highlighted many relevant signaling pathways and cellular functions enriched in the differentially expressed miRNAs, including hepatic fibrosis, insulin receptor, PPAR, Wnt/β-Catenin, VEGF, and mTOR receptor signaling pathways, fibrosis of the liver, cirrhosis of the liver, proliferation of hepatic stellate cells, diabetes mellitus, glucose metabolism disorder and proliferation of liver cells. Our findings suggest that miRNAs may play essential roles in the processes driving steatosis reduction in response to GLP-1R agonists, which warrants further functional investigations.

**Keywords:** Steatosis, NAFLD, Exendin-4, miRNAs, HepG2, GLP-1R agonist.

1. Introduction

Non-alcoholic fatty liver disease (NAFLD) is a clinicopathologic illness defined by excessive fat accumulation in the liver due to causes other than excessive alcohol use or viral infection. This illness encompasses simple steatosis (benign fatty infiltration), non-alcoholic steatohepatitis (NASH) (fatty infiltration with inflammation), fibrosis, and cirrhosis, which can develop into hepatocellular cancer [1-3]. NAFLD is linked to insulin resistance and genetic vulnerability [4]. Because of the rising incidence of obesity and obesity-related metabolic syndrome, NAFLD has become the primary cause of chronic liver disease in industrialized nations and the third cause of liver transplantation [5-8], and it is, therefore, a significant public health issue [9]. Presently, NAFLD has no approved pharmacotherapy. Sustained weight loss of at least 5% of the total body weight was beneficial for NAFLD patients, as reflected by improved liver enzyme levels and reduced liver fat content [10-12]. A loss of more than 10% of body weight appears to minimize inflammation and harm to liver cells and may even repair some fibrosis damage [13-15]. Nevertheless, most people find it challenging to achieve the weight loss required to improve their NAFLD and much harder to maintain their weight loss [16]. Consequently, there is a critical unmet medical need for effective pharmacological treatments for NAFLD that are not reliant on weight loss.

Glucagon-Like Peptide-1 Receptor Agonists (GLP-1RAs), which are modified variants of the endogenous GLP-1, such as Exendin-4 (Ex-4), reduce blood glucose levels and induce weight reduction, and are hence an effective therapeutic option for type 2 diabetes mellitus (T2DM) [17]. Current research shows that GLP-1RAs can lower hepatic lipid storage significantly by inhibiting fatty acid synthesis-related genes and promoting fatty acid oxidation-related expression levels [18, 19]. However, the effect of GLP-1RAs on the miRNA landscape in hepatic steatosis is yet unknown. MicroRNAs (miRNAs) are 22nt regulatory RNA molecules that regulate gene expression post-transcriptionally. Since their discovery in *Caenorhabditis elegans* in 1993 [20] , these short non-coding RNAs have been linked to various biological processes, including development, metabolic regulation, aging, and disease progression [21]. Notably, miRNAs have recently been found to play a significant role in lipid metabolism, inflammation, cell death, and tissue development, all of which significantly contribute to the risk of NAFLD [22, 23]. Because of their excellent stability in peripheral blood, miRNAs may be employed as diagnostic or predictive biomarkers for various human illnesses. Some of the miRNAs that were reported to be implicated in NAFLD include miR-219a, miR-373, miR-378c, miR-590, miR-3611, miR-376b, miR-186, miR-17, miR-1286, and miR-5699, miR-183, miR-31, miR-150, miR-182, miR-200a, miR-224, miR-92b, miR-3613, miR-708, and miR-766 in humans [24], miR-126, miR-150, miR-223, miR-483-3p, miR-1226, and miR-1290 in HepG2 cells [25], and miR-351, miR-434, miR-467a, and miR-682 in mice [26].

In the current study, we established an in vitro hepatic steatosis model by treating HepG2 with Oleic acid (OA). Typically, OA was used to establish in vitro steatosis models in different cell types, including HepG2 [27] and GLP-1RA Exendin-4 (Ex-4) was used to reduce lipid accumulation. We used NanoString technology to profile 799 highly curated human miRNAs from miRBase 22 in control, steatotic, and Ex-4-treated steatotic cells. Under the same condition, we have previously performed transcriptomics analysis [28] and used the mRNA data to identify the gene targets of the differentially expressed miRNAs.

**2. Results**

2.1. Study Design

We cultured HepG2 cells in 6-well plates until 70% confluency and then starved them for hours in DMEM containing 1% fatty-acid-free FBS. Following starvation, we incubated the cells at 37°C for 16-hour with 1% FBS DMEM containing 400 µM OA solution to induce steatosis. Following steatosis induction, we incubated the cells for three hours in fresh 1% FBS DMEM containing 400 µM OA solution in the absence or presence of 200 nM Ex-4. After treatment, we extracted total RNA, including miRNA. The samples were analyzed using NanoString technology for a miRNA panel which includes 799 highly curated human miRNAs to identify differentially regulated miRNAs between different treatments. Finally, the data were examined using various bioinformatics tools (Figure 1). Figure 1 was prepared using BioRender.


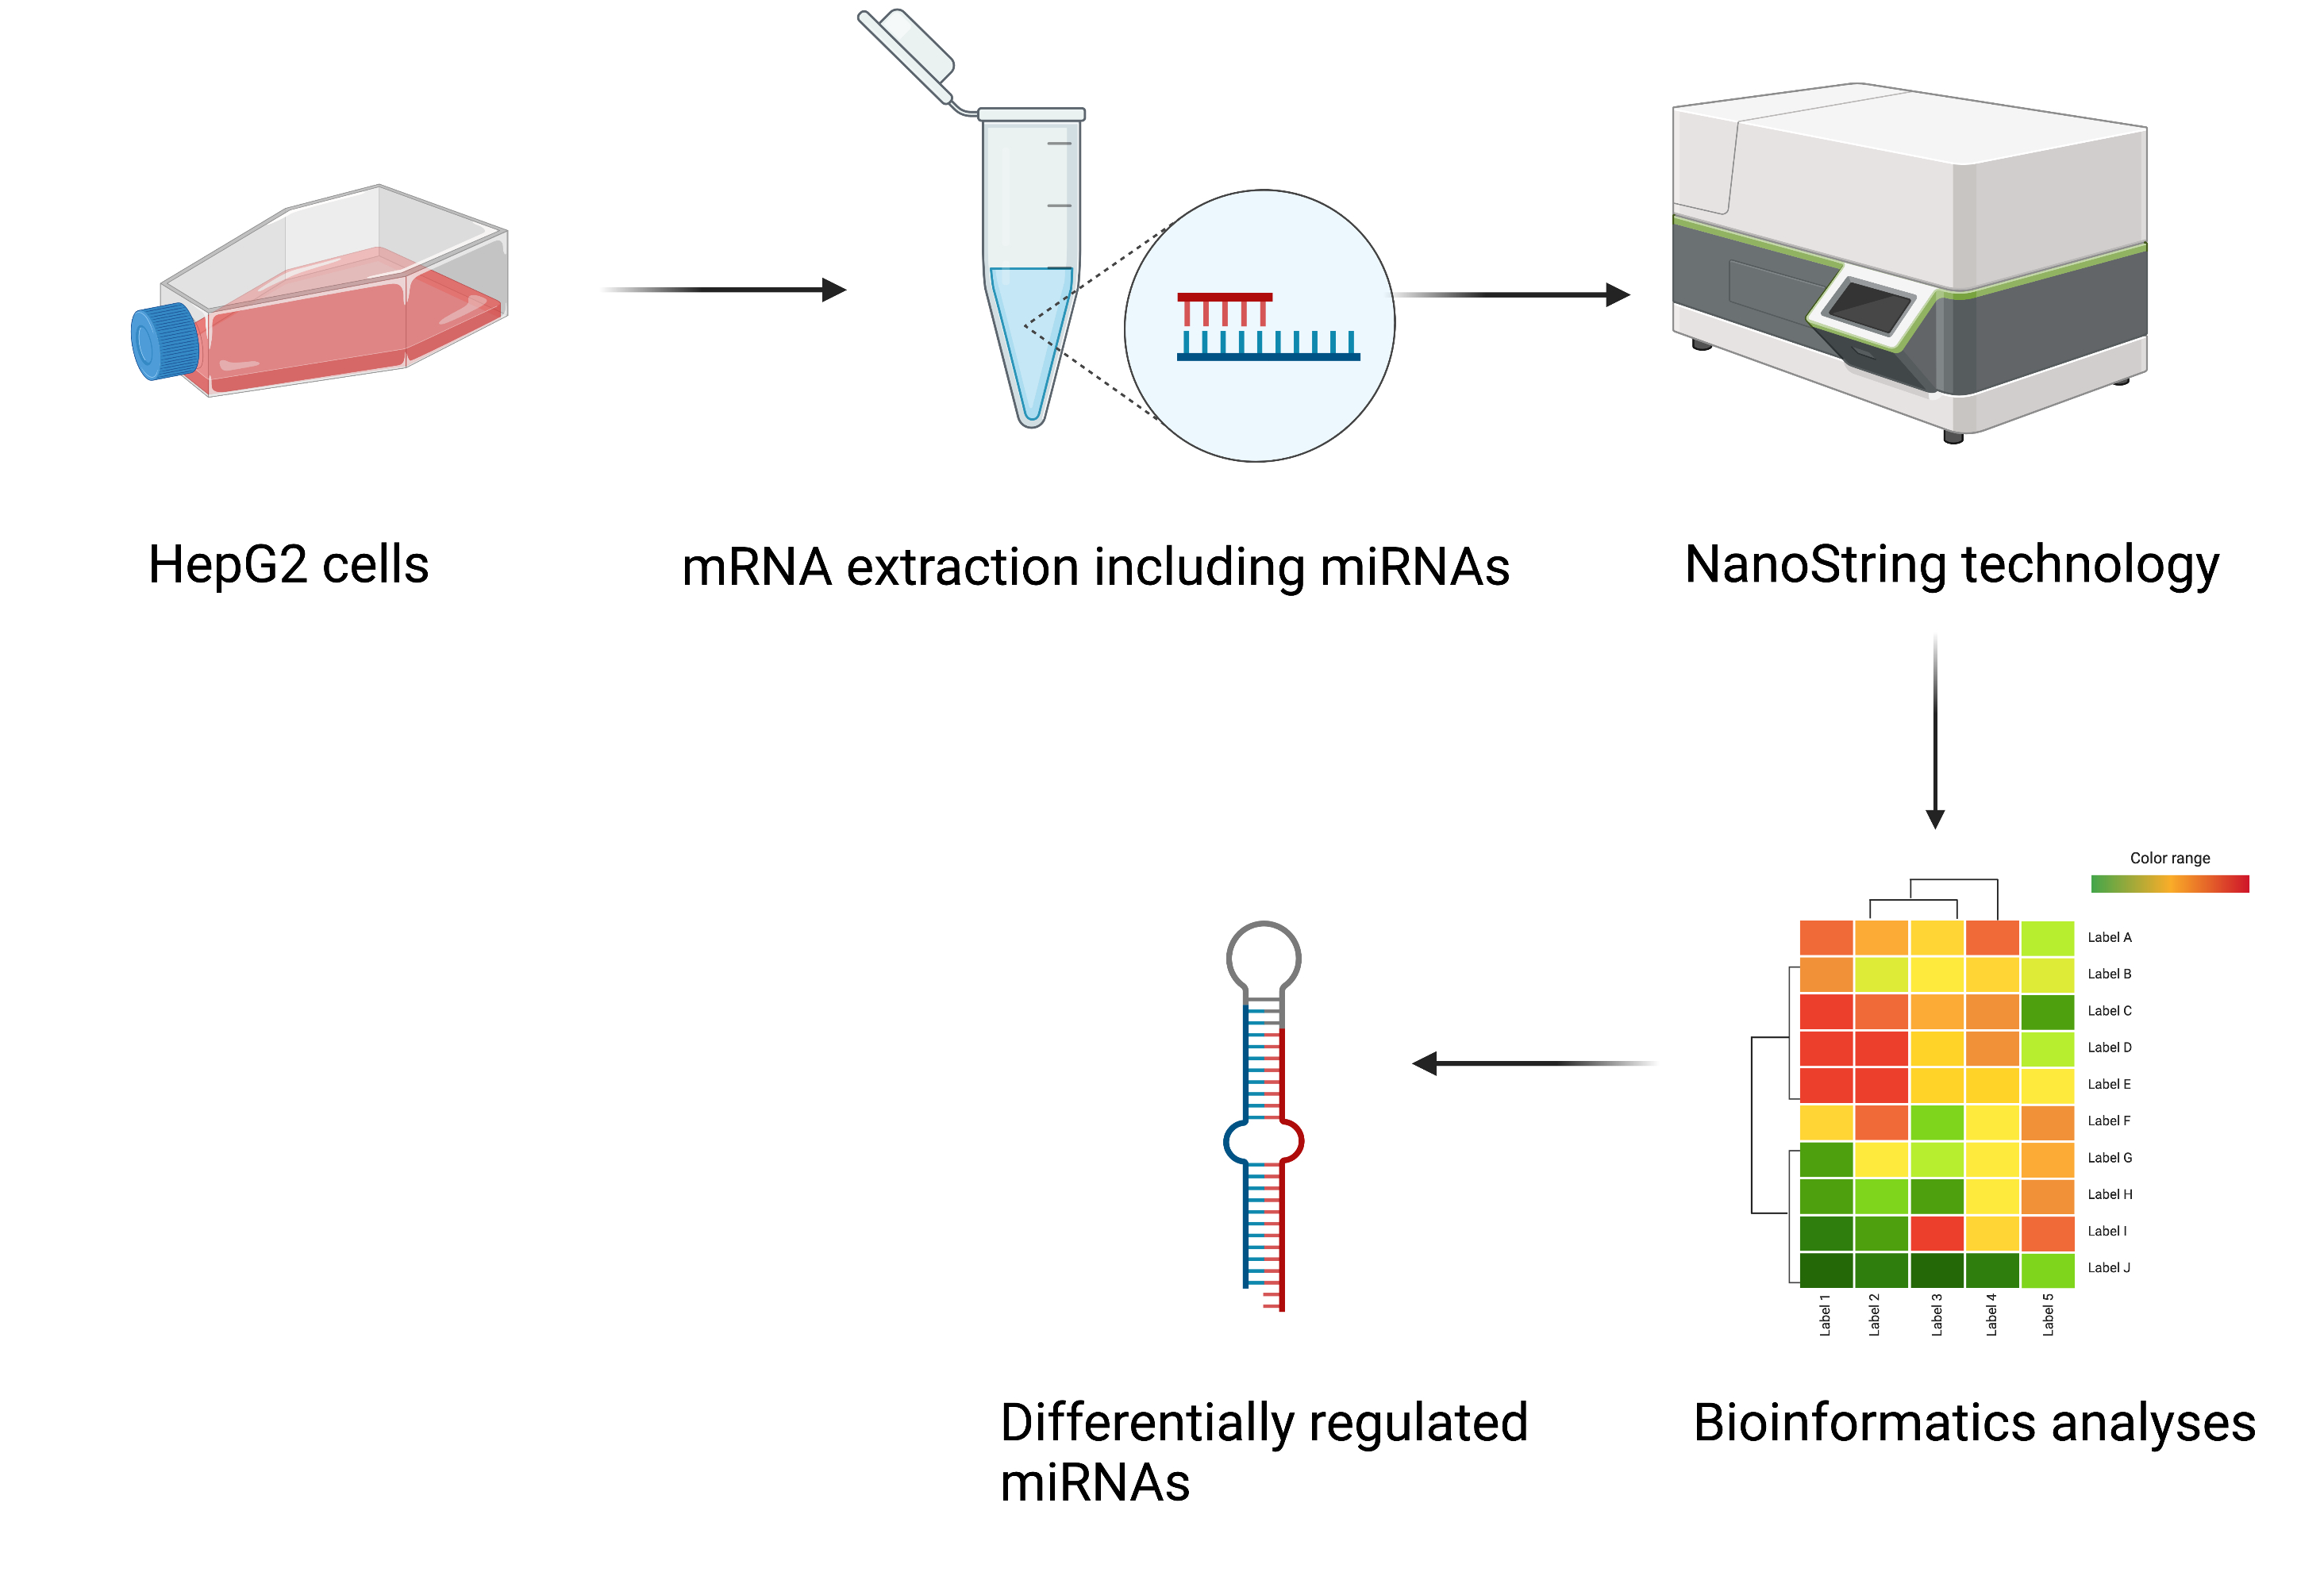


**Figure 1.** Study design. Samples from control, steatotic and Ex-4 treated cells were collected to extract total RNAs including miRNAs. The matrix for the NanoString technology was produced. To analyze and display the collected data, many bioinformatics tools were employed.

2.2. Exendin-4 reduces OA-induced lipid accumulation in HepG2

In agreement with our previous publications [18, 28, 29], treatment of HepG2 cells with 400 mM OA induces a significant accumulation of TGs in lipid droplets, which we could easily quantify or visualize with BODIPY staining. Treatment of the steatotic cells with 200 nM Ex-4 significantly reduced the lipid accumulation as reflected by the lowering of TGs content, the reduction of BODIPY staining, or the downregulation of the expression of perilipin mRNAs (Data not shown).

2.3. Identification of differentially expressed miRNAs

After normalization and filtering, 101, 105, and 82 miRNAs were identified in control, steatotic, and Ex-4-treated cells, respectively. The list of all the miRNAs is shown in supplementary table S3. Of these miRNAs, 78 are shared by the three groups, 21, 2, and 1 miRNA were identified commonly between each pair of groups, i.e., control versus steatotic, steatotic versus Ex-4-treated, and control versus Ex-4-treated cells, while 1, 4, and 1 miRNA were expressed exclusively in control, steatotic, and Ex-4-teared cells, respectively (Supplementary data S1A). The hierarchical clustering heatmap in Supplementary data S1B visualizes the distinct miRNA profiles between the different treatment conditions using all the miRNAs. To better understand the role of miRNAs in steatosis and the Ex-4 beneficial effect on steatosis, we compared a) steatotic cells versus control cells and b) Ex-4-treated cells versus steatotic cells. The results of each comparison are presented separately for convenience in a) and b) sections:

1. Differentially expressed miRNAs in steatotic versus control cells

When comparing the miRNA expression profile of steatotic and control cells, 99 miRNAs were shared between the two groups, while 2 and 6 miRNAs were expressed exclusively in control cells and steatotic cells, respectively (Figure 3A). We detected nine differentially expressed miRNAs (DEmiRs) (FC>2 and FDR<0.05) between control and steatotic cells, with two being downregulated (hsa-miR-30e-p and hsa-miR-1246) and seven being up-regulated (hsa-miR-345-5p, hsa-miR-379-5p, hsa-miR-362-5p, hsa-miR-651-5p, hsa-miR-421, hsa-miR-122-5p, hsa-miR-4488) in steatotic compared to control cells (Figure 3A, 3B and 3C). The hierarchical clustering heatmap based on the t-test (p<0.05) in figure 3D visualizes the distinct miRNAs profiles between steatotic and control cells using the top 25 DEmiRs.

**Figure 2.** Differentially expressed miRNAs between steatotic and control cells. A. Venn diagram showing the distribution of miRNAs affected by steatosis. B. Volcano plot of differentially expressed miRNAs. Single miRNAs are depicted as dots. miRNAs were up-regulated (red) or downregulated (in blue) in steatotic compared to control cells (FC>2 and FDR<0.05). C. List of DEmiRs between steatotic and control cells. D. The hierarchical clustering heatmap of miRNA expression data from the control and steatotic cells based on t-test (p<0.05) (n=4 for each condition). The miRNAs species are shown on the right. The heatmap is based on normalized miRNA expression values from each dataset. The dendrogram shows significantly different expression levels of miRNAs among samples. Brown and blue indicate high and low expression, respectively.

Chemometric analysis

In addition to the differential expression analysis, we performed Principal Component Analysis (PCA) on the data sets from control and steatotic cells. The scores plot in figure 3A shows a clear separation between the two groups. The first and second principal components, PC1 and PC2, accounted for 37.1% and 20.7% of the total variance in the data. We further performed partial least squares discriminant analysis (PLS-DA) to identify the most critical miRNAs for separating the two groups. In the PLS-DA scores plot in figure 3B, PC1 and PC2 account for 33.2% and 24.3% of the total variance, respectively. Using leave out one cross-validation (LOOCV), the R2 and Q2 values of the model were, respectively, 0.92 and 0.64 for PC1 and 0.99 and 0.78 for PC2, suggesting that the model is robust. We then used the Variable Important in Projection (VIP) score to identify the essential miRNAs for the separation we see in the PLS-DA score plot. We identified 42 miRNAs that have VIP > 1 (the threshold that is typically used to select relevant features) (supplementary table S4), and figure 3C shows the top 15 features that contribute the most to the separation we see in figure 3B.

**Figure 3.** Chemometric analysis of miRNAs data set from steatotic compared to control samples, and Ex-4-treated to steatotic samples. A. PCA score plot between steatotic and control samples. B. PLS-DA score plot between steatotic and control samples. C. Important features (VIP scores) identified by PLS-DA between steatotic and control samples. The colored boxes on the right indicate the relative levels of the corresponding element in control (1) and steatotic (2) cells. The colored oval shapes in A and B indicate the 95% confidence regions. D. PCA score plot between Ex-4-treated and steatotic samples. E. PLS-DA score plot between Ex-4-treated and steatotic samples. (F) Important features (VIP scores) identified by PLS-DA between Ex-4-treated and steatotic samples. The colored boxes on the right indicate the relative levels of the corresponding element in Ex-4-treated (3) and steatotic (2) cells. The colored oval shapes in D and E indicate the 95% confidence regions.

Pathway enrichment analysis

To investigate the signaling pathways that could potentially implicate the DEmiRs between steatotic and control cells, we first identified their bone-fide mRNA targets. Hence, we uploaded the DEmiRs into the Ingenuity Pathway Analysis application, along with the DEmRNAs (differentially expressed mRNAs) between the two groups, which we obtained by whole transcriptome profiling under the same experimental conditions and used in our previous paper [28]. We identified mRNA targets of our DEmiRs using predicted miRNA–mRNA binding relationships from TargetScan with high confidence, and we only selected miRNAs-mRNA pairs with opposite directions of expression, i.e., when the miRNA is up-regulated, the mRNA is downregulated, and vice versa. Under the conditions, we identified 15 unique gene targets (Table S1). We subsequently used the 15 identified target genes to determine the enriched canonical pathways, diseases, and cellular and molecular functions (Figure 4). Our analysis identified several canonical pathways that were enriched in the DEmiRs target proteins and that are relevant to steatosis and NAFLD, including HIF1a, mTOR, TGF-b, PTEN, PPAR, NF-kB, insulin receptor, PI3K/AKT, Hepatic Fibrosis / Hepatic Stellate Cell Activation, and Hepatic Fibrosis Signaling Pathways (Figure 4A and 4B). On the other hand, we identified several diseases and cellular functions that are associated with the DEmiRs target and might be relevant to NAFLD, including Carbohydrate Metabolism, Hepatic System Disease, Cell Signaling, Molecular Transport, Lipid Metabolism, Small Molecule Biochemistry, Cellular Function and Maintenance, Endocrine System Development and Function, Inflammatory Response, Cellular Growth and Proliferation, Inflammatory Disease, Cell Death and Survival, Endocrine System Disorders, and Metabolic Disease, diabetes mellitus, inflammation of the liver, proliferation of hepatocytes, and cell death of hepatocytes (Figure 4C and 4D).


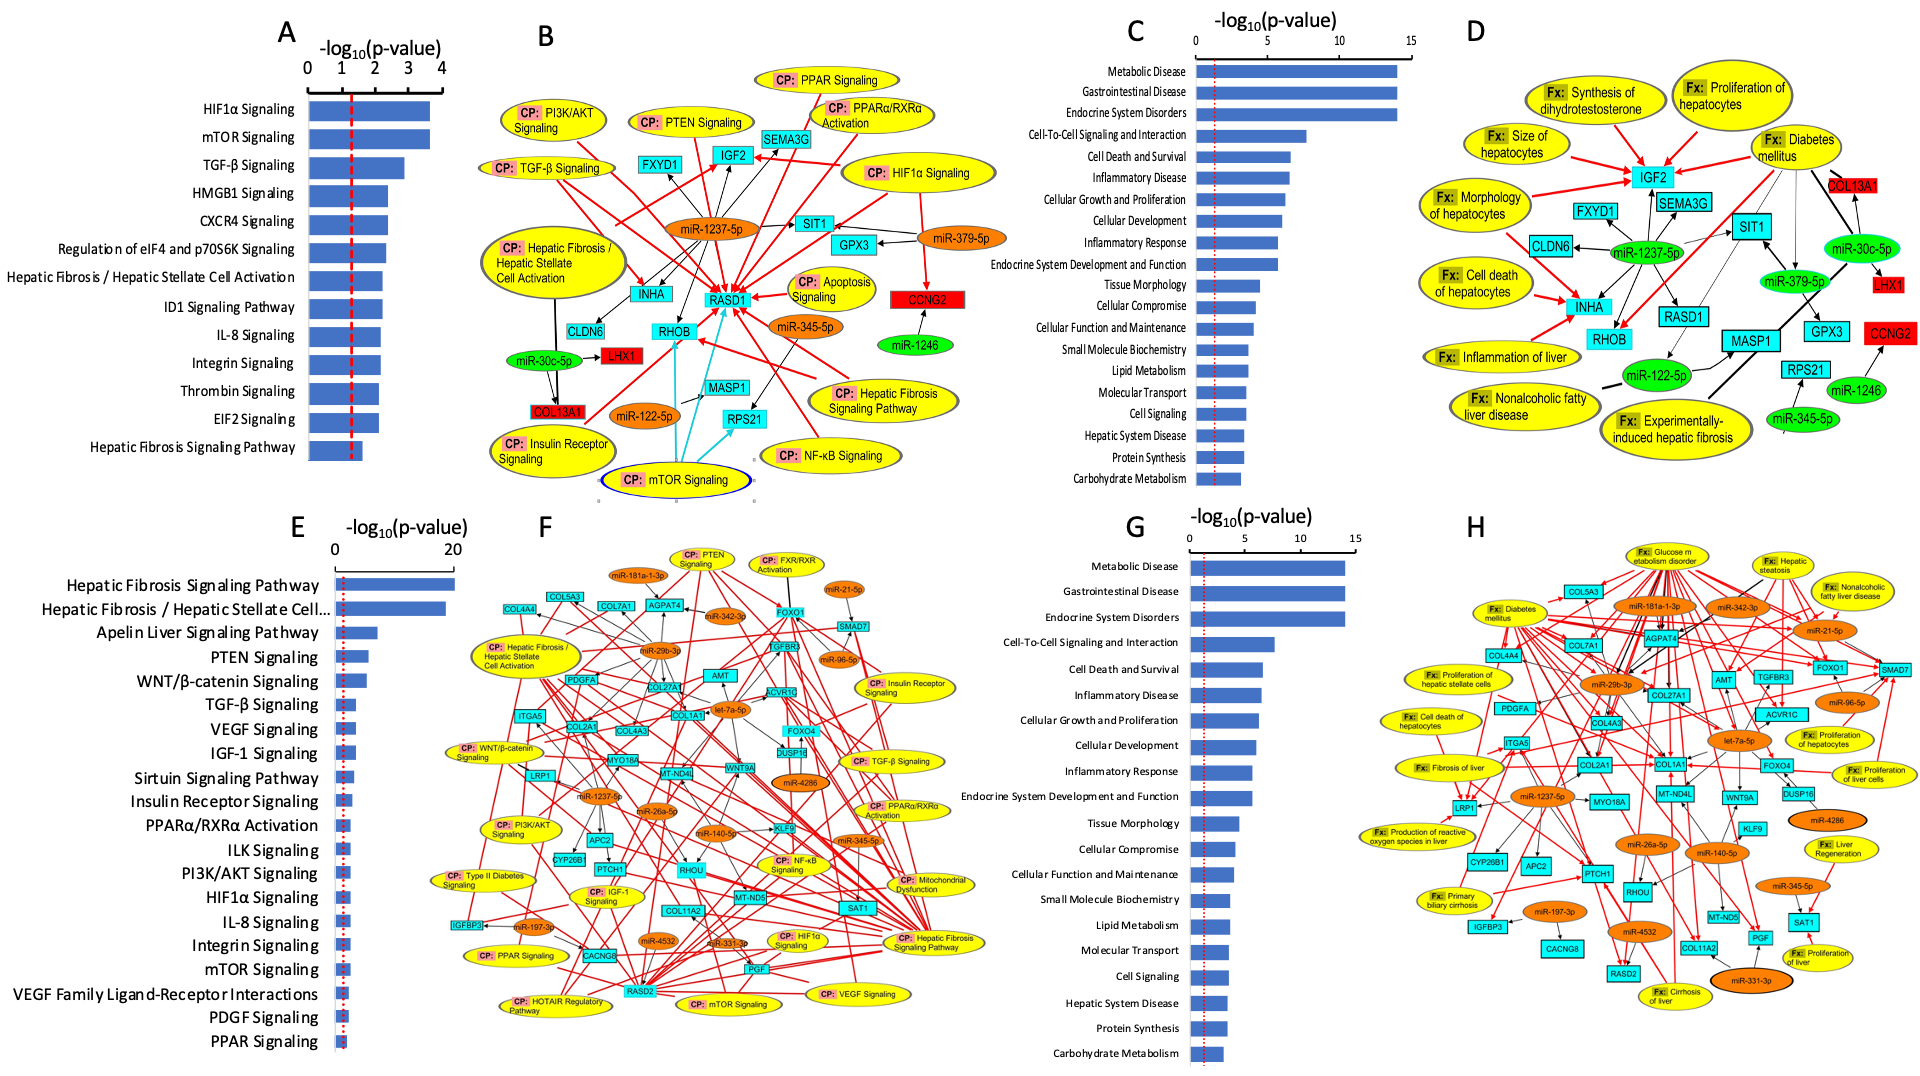


**Figure 4.** miRNA-mRNA interaction and enriched canonical pathways (CP) (A, B, E, and F) and diseases and functions (Fx) (C, D, G and H) using differentially expressed miRNAs between control cells compared to steatotic cells (A, B, C and D) and Ex-4-treated compared to steatotic samples (E, F, G and H). The canonical pathways involve at least one protein (blue (downregulated) and red (up-regulated) boxes) and one miRNA (orange (up-regulated) and (green (downregulated) boxes). The black arrows indicate link between miRNAs and their target proteins, while the red arrows indicate relationship between proteins and canonical pathways or cellular functions.

1. Differentially expressed miRNAs in Ex-4-treated versus steatotic cells

When we compared the miRNA datasets from Ex-4-treated and steatotic cells, 80 miRNAs were shared between the two groups, while 25 and 2 miRNAs were expressed, respectively, only in Ex-4-treated and steatotic cells (Figure 5A). We detected 34 differentially expressed miRNAs (DEmiRs) (FC> two and FDR<0.05) between Ex-4-treated and steatotic cells, with 2 being up-regulated and 32 being downregulated in steatotic compared to control cells (Figure 5B and 5C). The hierarchical clustering heatmap based on the t-test (p<0.05) in Figure 4D illustrates the distinct miRNA profiles between Ex-4-treated and steatotic cells using the top 25 DEmiRs. Notably, there is no miRNA:mRNA pairs that overlap between steatotic vs controls cells and Ex-4-treated vs steatotic cells. The only miRNA whose expression was reversed by Ex-4 treatment was hsa-miR-345-5p.

Chemometric analysis

In addition to the differential expression analysis, we performed Principal Component Analysis on the data sets from Ex-4-treated and steatotic cells. The scores plot in figure 3D shows a clear separation between the two groups. The first and second principal components account for 66.7% and 10% of the total variance in the data, respectively. We further performed PLS-DA to identify the most important miRNAs for separating the two groups. In the PLS-DA scores plot in figure 3E, PC1 and PC2 account, respectively, for 66.6% and 10% of the total variance. Using LOOCV, the R2 and Q2 values of the model were, respectively, 0.91 and 0.83 for PC1 and 0.99 and 0.90 for PC2, indicating the robustness of the model. We then used the Variable Important in Projection (VIP) score to identify the most important miRNAs for the separation we see in the PLS-DA scores plot. We identified 57 miRNAs that have VIP > 1 (the threshold that is typically used to select relevant features) (supplementary table S5), and figure 3F shows the top 15 features that contribute the most to the separation we see in figure 3E.

**Figure 5.** Differentially expressed miRNAs between Ex-4-treated and steatotic cells. A. Venn diagram showing the distribution of miRNAs affected by Ex-4 treatment. B. Volcano plot of differentially expressed miRNAs. Single miRNAs are depicted as dots. miRNAs were up-regulated (red) or downregulated (in blue) in Ex-4-treated compared to steatotic cells (FC>2 and FDR<0.05). C. List of DEmiRs between steatotic and control cells. D. Heatmap of miRNA expression data from the Ex-4-treated and steatotic cells. Only the top 25 miRNAs are shown (n=4 for each condition). The miRNAs species are shown on the right. The heatmap is based on normalized miRNA expression values from each dataset. The dendrogram shows significantly different expression levels of miRNAs among samples. Brown and bleu indicate, respectively, high, and low expression.

Pathway enrichment analysis

To explore the signaling pathways associated with the DEmiRs between Ex-4-treated and steatotic cells, we first identified their mRNA targets. To do so, we uploaded the DEmiRs into the IPA application, along with the DEmRNAs between the two groups, which we obtained by whole transcriptome profiling under the same experimental conditions and used in our previous paper [28]. We identified mRNA targets of our DEmiRs using predicted miRNA-mRNA binding relationships from TargetScan with high confidence. We only selected miRNA-mRNA pairs with opposite directions of expression, i.e., when the miRNA is up-regulated, the mRNA is downregulated, and vice versa. Under the conditions, we identified 34 unique gene targets (Table S2).


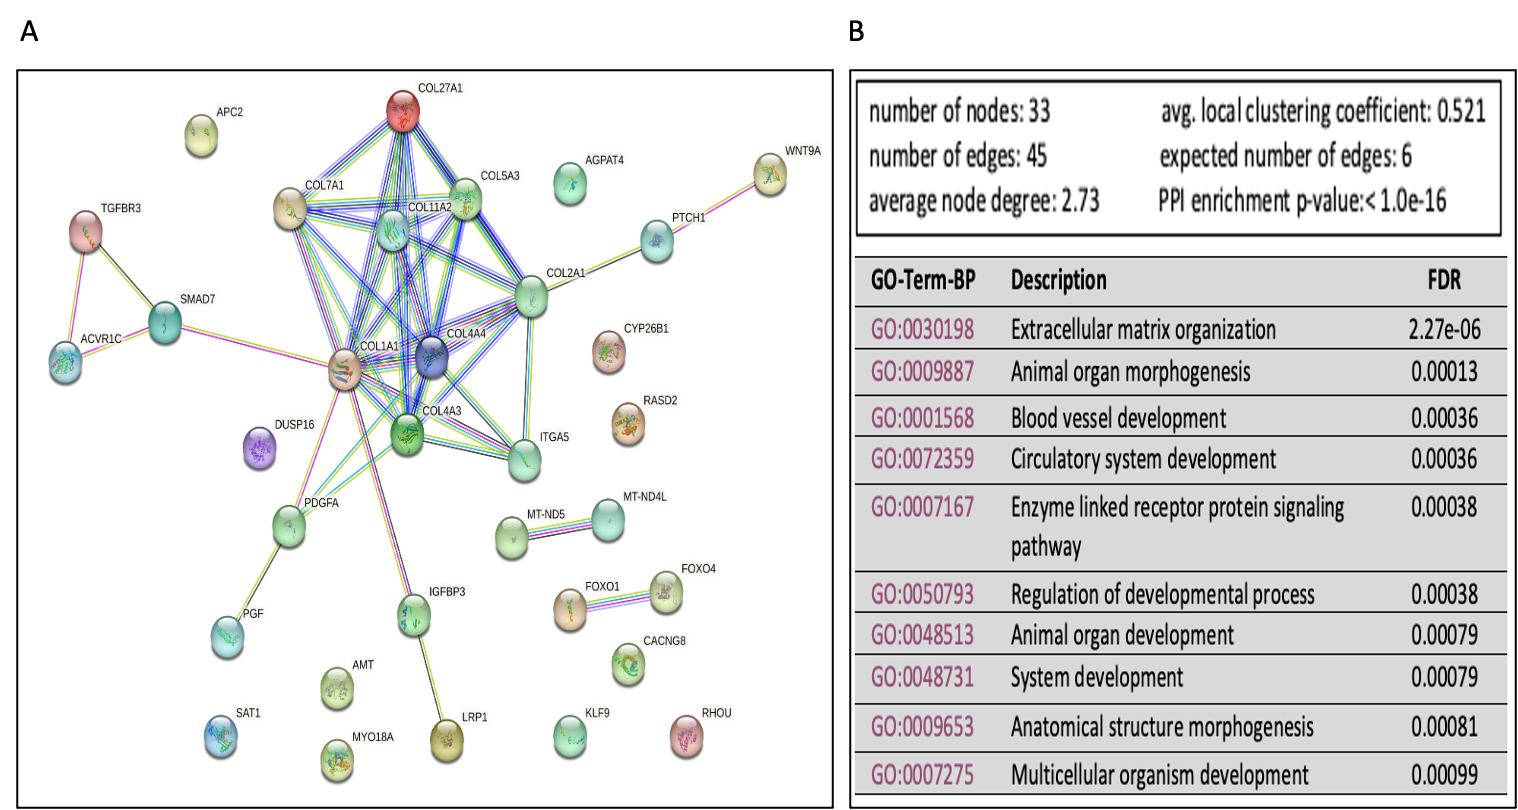


**Figure 6.** Functional enrichment analysis of mRNA that could be associated with miRNAs dysregulated in Ex-4 treated cells versus steatotic cells.A. The protein-protein interaction (PPI) network generated for the 34 gene targets of the identified DEmiRs between Ex-4 treated and steatotic cells. Network nodes represent proteins, while edges depict protein-protein associations. The key network statistics are also presented. B. The top 10 functional enrichment annotations from Gene Ontology (GO) Biological Process are listed. STRING DataBase 11.5 was used for data analysis.

We then used the 33 target genes to examine the enriched canonical pathways, diseases, and cellular and molecular functions (Figure 4). We identified several canonical pathways that are enriched in the DEmiRs target proteins and that are relevant to steatosis and NAFLD, including Hepatic Fibrosis Signaling Pathway, Hepatic Fibrosis / Hepatic Stellate Cell Activation, Apelin Liver Signaling Pathway, PTEN Signaling, WNT/β-catenin Signaling, TGF-β Signaling, VEGF Signaling, IGF-1 Signaling, Sirtuin Signaling Pathway, Insulin Receptor Signaling, PPARα/RXRα Activation, PI3K/AKT Signaling, HIF1α Signaling, and mTOR Signaling (Figure 4E and 5F).

We also identified several diseases and cellular functions that are associated with the DEmiRs target and might be relevant to NAFLD, including carbohydrate metabolism, hepatic system disease, lipid metabolism, small molecule biochemistry, endocrine system development and function, inflammatory response, inflammatory disease, cell death and survival, endocrine system disorders, and metabolic disease (Figure 4G and 4H).

To further explore and annotate the potential molecular pathways affected in Ex-4-treated, we used the experimentally validated DEmiRs gene targets to perform protein-protein interaction (PPI) analysis using the STRING tool [30] (https://string-db.org/). The PPI network showed several significant (FDR<0.05) enrichments and associations of multiple proteins in mediating several pathways (Figure 6A). There were 93 significant (FDR<0.05) Gene Ontology terms for biological processes. The top ten are shown in figure 6B and include extracellular matrix organization, animal organ morphogenesis, blood vessel development, and others. On the other hand, there were five significant GO-terms for Molecular, including extracellular matrix structural constituent conferring tensile strength, extracellular matrix structural constituent, growth factor binding, platelet-derived growth factor binding, and β-catenin binding. Finally, there were eleven significant GO-terms for cellular components, including complex of collagen trimers, collagen trimer, endoplasmic reticulum lumen, fibrillar collagen trimer, extracellular matrix, endoplasmic reticulum, basement membrane, collagen type IV trimer, plasma membrane protein complex, receptor complex, and membrane protein complex.

2.4 Validation of miRNA differential expression with qRT-PCR

The expression levels of six differentially expressed miRNAs between steatotic and Ex-4-treated cells were validated with qRT-PCR in independent samples. Except miR-1246, the expression levels of miR-122-5p, miR-4488, miR-651, miR-345, and miR-379 were consistent with the NanoString data (Figure 7).

**Figure 7 :** Validation of the differential expression of a set of miRNAs with qRT-PCR. Comparison of the expression of miR-122, miR- 4488, miR-651, miR-345, miR-379, and miR-1246 between steatotic cells and Ex-4-treated steatotic cells using qRT-PCR and Nanostring. The experiment was performed in triplicate.

**3. Discussion**

Because of the increasing prevalence of obesity, NAFLD has become one of the most common causes of chronic liver disease [31]. NAFLD presently has no approved pharmacotherapy. However, recent human and animal research has shown some beneficial effects of the GLP-1R agonists [32-36]. The mechanisms underlying this positive effect remain elusive, nevertheless.

We profiled a panel of 799 highly curated human miRNAs in this investigation to see if the regulation of miRNA expression and gene targets, as well as the associated signaling pathways and biological processes, might explain the observed Ex-4-induced reduction of OA-induced steatosis in HepG2 cells. We identified significant differences in the expression of several miRNAs between control and steatotic cells on the one hand and between steatotic cells and Ex-4-treated steatotic cells on the other hand. We also found that several of the DEmiRs' target proteins are involved in various biological processes and signaling pathways germane to NAFLD.

Because of the ubiquitous expression of the GLP-1R, the agonists of this receptor exhibit pleiotropic effects in vivo [37]. Treatment with GLP-1R agonists, among other things, results in significant weight loss and enhanced insulin sensitivity, which eventually contribute to a reduction in liver fat content [37]. Recent research, however, suggests that the beneficial effects of GLP-1R agonists on NAFLD may be mediated by direct activation of the GLP-1R on hepatocytes independently of weight loss [38, 39]. Nevertheless, other studies have contested this hypothesis because they could not detect GLP-1R in liver cells due to very low levels of hepatic GLP-1R expression [40]. The GLP-1R expression in the liver cells remains controversial, but several groups, including us, have detected it in HepG2 and human hepatocytes [18, 38, 39].

Mammalian miRNAs regulate gene expression post-transcriptionally, which impacts signaling pathways involved in many disorders, including NAFLD [23, 29, 41-44].

Compared to control cells, steatotic cells exhibited significant up- and down-regulation of seven and two miRNAs, respectively (Supplementary data S1C). On the other hand, two and 34 miRNAs were up- and down-regulated in Ex-4-treated steatotic cells compared to steatotic cells, respectively (Figure 4C). The function of several DEmiRs in our study is unknown, whereas many others have been linked to different diseases, including liver disease [45, 46]. Remarkably, the expression of six miRNAs (hsa-miR-122-5p, hsa-miR-345-5p, hsa-miR-379-5p, hsa-miR-651-5p, hsa-miR-1246, hsa-miR-4488), which were up-regulated in response to OA exposure, was reversed following Ex-4 treatment. This shift in expression suggests that these five miRNAs may be essential in reducing OA-induced lipid buildup produced by Ex-4 therapy.

Hsa-miR-122-5p is one of the most investigated miRNAs, and multiple studies have revealed that it is involved in various physiological processes of the liver. For instance, miR-122 promotes hepatic lipogenesis by inhibiting the LKB1/AMPK pathway by targeting Sirt1 in NAFLD [47]. A recent study reported that the downregulation of miR-122-5p activates glycolysis via PKM2 in Kupffer cells of rat and mouse models of NASH [48]. Additionally, miR-122-5p inhibition improves inflammation and oxidative stress damage in dietary-induced NAFLD by targeting FOXO3 [49]. Interestingly, the hepatic and serum miR-122 levels were significantly higher in hepatic steatosis and fibrosis in humans [50, 51]. Our network and pathway analysis also indicate that miR-122-5p is associated with NAFLD and diabetes mellitus (Figure 3D). We also found that the miR-122-5p targets MASP1 (Mannan-binding lectin serine protease 1). MAPS1 functions as a component of the lectin pathway of complement activation, which plays an essential role in the innate and adaptive immune response. When abnormally activated, the complement system can induce inflammation and damage to normal tissues and participate in the development and progression of various diseases. We could not find any link between MASP1 and NAFLD. However, recent studies have shown that complement activation is involved in the genesis and development of alcoholic liver disease (ALD) [52]. Further investigations are warranted to examine the potential link between miR-122-5p/MASP1 and NAFLD development.

Hsa-miR-345-5p was notably up-regulated in steatotic cells compared to control cells in our study (FC=5.99, FDR= 9.9E-08). Remarkably, Ex-4 treatment reversed the direction of expression of miR-345-5p to be down-regulated in Ex-4 treated cells compared to steatotic cells (FC=0.16703, FDR=1.7632E-06). MiR-345-5p was recently shown to be down-regulated in liver fibrosis and prevents the progression of liver fibrosis by suppressing hypoxia-inducible factor-1alpha (HIF1α) expression in mice [53]. The same study showed that the miR-345-5p-HIF1α axis might be a potential therapeutic target for liver fibrosis [53]. Our network analysis indicates that miR-345-5p targets RPS21, which is involved in the mTOR canonical pathway. The mTOR pathway is implicated in developing NAFLD [54, 55]. MiR-345-5p also targets SAT1, which is implicated in HIF1a signaling, which in turn is linked to the development of NAFLD [56-58].

Compared to control cells, the upregulation of hsa-miR-379-5p in steatotic cells was also reversed after Ex-4 treatment, suggesting its potential relevance for the beneficial effect of Ex-4-on steatosis in HepG2 cells. Several studies have indicated the role of miR-379 in metabolic pathways. For instance, individuals with early-stage NAFLD had increased serum miR-379-5p expression, implying that it might be used as a biomarker to distinguish NAFLD patients from controls [59]. The same study suggested that miR-379 increases cholesterol lipotoxicity, which promotes the development and progression of NAFLD by interfering with the expression of target genes, including those in the IGF-1 signaling pathway [59]. Also, hepatic miR-379-5p deficiency reduces serum very low-density lipoprotein-associated triglyceride (VLDL-TG) levels by promoting hepatic lipid re-uptake and TG accumulation [60]. Recently, Cao and coworkers showed that the lack of miR-379/miR-544 cluster resists high-fat diet-induced obesity and prevents hepatic triglyceride accumulation in mice [61]. Dong et al. lately reported that miR-379-5p inhibits STAT1 expression and regulates cholesterol metabolism through the STAT1/HMGCS1 axis in db/db mice, suggesting miR-379-5p might be applied to improve lipotoxicity and relieve diet induced-liver damage [62]. Altogether, these data indicate that miR-379-5p might play a vital role in the positive effect of Ex-4 on lipid accumulation we observe in our study.

Hsa-miR-651-5p expression was also up-regulated in steatotic cells and became down-regulated after Ex-4 treatment, suggesting a potential role of this miR in the beneficial effect of Ex-4 on OA-induced lipid accumulation. The role of miR-651-5p in liver metabolism, steatosis, or NAFLD has not been reported previously, and further investigations are warranted to examine it.

Another miR whose expression is down-regulated in steatotic cells and up-regulated following Ex-4 treatment in our study is hsa-miR-1246. We could not find any studies linking hsa-miR-1246 to steatosis or NAFLD. However, our network and pathway analysis showed that miR-1246 targets CCNG2. CCNG2 is associated with the HIF1a canonical pathway, which is known to be involved in NAFLD [56-58, 63-65].

Hsa-miR-4488 was also up-regulated in steatotic cells and down-regulated following Ex-4 treatment. However, we could not locate any study that indicated a relationship between this miR and lipid metabolism, steatosis, or NAFLD. Further studies are, therefore, needed to understand better the role that this miR might play in the beneficial effect of Ex-4.

Ex-4 not only reversed the effect of OA on the expression of the six miRs indicated above, but it also modulated the expression of several other miRs compared to steatotic cells. IPA revealed that many of these miRs target genes linked to canonical pathways or biological functions germane to NAFLD. For instance, hsa-miR-let7-5p targets ACVR1C, AMT, COL1A1, COL27A1, DUSP16, MT-ND4L, TGFBR3, WNT9A genes. According to IPA, the COL1A1 gene is linked to “fibrosis of the liver”, “cirrhosis of the liver”, “proliferation of hepatic stellate cells”, “diabetes mellitus”, “glucose metabolism disorder”, and “proliferation of liver cells”. The AMT gene is associated with “hepatic steatosis” and “NAFLD”, and the canonical pathway “PI3K/AKT signaling”. In contrast, the ACVR1C gene is linked to “hepatic steatosis” and “glucose metabolism disorder” and the canonical pathways “TGF-b signaling”, “WNT/b-catenin signaling” and “PPARa/RXRa activation pathway”. WNT9A, TGFBR3, and ACVR1C are linked to the canonical pathways “WNT/b-catenin signaling” and “HOTAIR regulatory pathway” known for their implication in NAFLD [18, 66, 67]. Hsa-miR-4532 targets the RASD2 gene, which is associated with the canonical pathways “insulin receptor signaling”, “TGF-b signaling”, “PPARa/RXRa activation pathway”, and “NF-kB signaling”, all of which have known associations with NAFLD [68-72]. Likewise, miR-1237-5p targets PTCH1, ITGA5, and LRP1 genes, which are associated with “cirrhosis of the liver”, “fibrosis of the liver”, “glucose metabolism disorder”, and “production of reactive oxygen species in the liver” and with the NAFLD-related canonical pathways “hepatic fibrosis signaling pathway”, “PI3K/AKT signaling”, and “PTEN signaling” [73]. Interestingly, a recent study reported that the GLP-1R agonist liraglutide ameliorates NAFLD in diabetic mice via the IRS2/PI3K/AKT signaling pathways [74]. Genetic and molecular studies, particularly in the context of non-alcoholic fatty liver disease (NAFLD), support a critical role for PTEN in hepatic insulin sensitivity and the development of steatosis, steatohepatitis, and fibrosis [75]. Additionally, miR21-5p and miR-96-5p target SMAD7, which is linked to “fibrosis of the liver” [76] “proliferation of liver cells”, “proliferation of hepatocytes”, “diabetes mellitus”, and “glucose metabolism disorder”. SMAD7 is also associated with the canonical pathways “TGF-b signaling”, “hepatic fibrosis signaling pathway”, and “hepatic fibrosis/hepatic stellate cell activation”.

In recent years, the role of liver-resident cells, such as Kupffer cells and hepatic stellate cells (HSCs), in the development of NAFLD has been implicated. Kupffer cells are specialized macrophages that exist in the liver and play an important role in liver homeostasis. Kupffer cells are activated in NAFLD, resulting in an increase in the production of pro-inflammatory cytokines and chemokines, which contribute to the development of hepatic inflammation and fibrosis [77]. HSCs are another type of liver-resident cell that plays an important role in the pathophysiology of NAFLD. They are found in the Disse area and are in charge of vitamin A storage as well as the generation of extracellular matrix proteins. HSCs become activated in response to liver injury or inflammation, resulting in their metamorphosis into myofibroblast-like cells. These cells are characterized by their ability to produce excessive amounts of extracellular matrix proteins, which contribute to the development of liver fibrosis [78]. . Several studies have shown that Kupffer cells and HSCs have a role in the pathophysiology of NAFLD. Miura et al., for example, discovered that Kupffer cells play a critical role in the development of steatohepatitis in mice fed a high-fat diet. The authors discovered that removing Kupffer cells from these mice reduced hepatic inflammation and fibrosis [79]. Marra et al. discovered that HSCs are activated in the livers of NAFLD patients and that this activation is related to the severity of liver fibrosis [80]. Given that different microRNAs targeting inflammation and liver fibrosis were altered in the steatotic, and Ex-4 treated steatotic HepG2 cells, one cannot exclude a potential in vivo effect of the GLP-1R agonists on the miRNAs profiles in Kupffer cells and HSCs to lower inflammation and liver fibrosis and thus improve NAFLD. Future investigations are warranted to investigate this hypothesis.

Our study revealed that specific miRNAs are up or downregulated in the steatotic HepG2 cells compared to control cells, whereas the Ex-4 treatment of steatotic cells affected the expression of additional miRNAs compared to steatotic HepG2 cells. This observation underscores the potential role of theses miRNAs in the modulation the expression of a myriad of genes involved in hepatic lipid metabolism and inflammation, which ultimately leads to improvement of steatosis in the present study, and NAFLD in vivo. Our study paves the way for future in vivo studies to better understand the contribution of the modulation of the miRNA profile of hepatocytes, and maybe other liver cells, to the positive effect of GLP-1R agonists on NAFLD. The understanding of the full mechanisms whereby each miRNA contributes to the reduction of lipid accumulation upon Ex-4 treatment will requires further investigations and may open new avenues for the discovery of new drug targets for NAFLD.

Overall, our findings show that the Ex-4 cell treatment simultaneously affects the activity of numerous steatosis-related signaling pathways by modulating the expression of distinct miRNAs, which may explain the observed significant reduction in lipid accumulation.

**4. Material and Methods**

4.1. HepG2 culture and OA preparation

The human hepatoma HepG2 cell line (HB-8065, ATCC) was obtained from ATCC (Manassas, Virginia, USA) and was cultured in Dulbecco's modified Eagle's medium (DMEM) (31966047, Gibco, Massachusetts, USA) supplemented with 10% FBS (10500064, Gibco, Massachusetts, USA) and 1% penicillin/streptomycin (15070063, Gibco, Massachusetts, USA) at 37 °C and 5% CO2. We carried out all the experiments with cells passaged no more than 25 times. We prepared the oleic acid (OA) solution as described in [81]. Briefly, OA (O-1008 Sigma-Aldrich, Germany) powder was dissolved at a final concentration of 12 mM in phosphate-buffered saline (PBS; 137 mM NaCl, 10 mM phosphate, 2.7 mM KCl, and pH 7.4) containing 11% fatty acid-free bovine serum albumin (FFA-BSA; 0215240110, MP Biomedicals, Santa Ana, CA, USA). The solution was then sonicated and shaken overnight at 37 °C with an OM10 orbital shaking incubator (Ratek Instruments Pty, Ltd., Boronia, Australia). The OA solution was filtered with a 0.22 μM filter, aliquoted, and kept at 4 °C. We utilized a fresh aliquot for each experiment.

4.2. Induction of steatosis and treatment with Exendin-4

To create the steatosis cell model and treat it with Ex-4, we used the same procedure as in our recent publications [18, 28]. In brief, we cultured HepG2 cells in 6-well plates at a density of 4x105 cells/well until 70% confluency, then starved them for 6 hours in DMEM containing 1% fatty-acid-free FBS. Following starvation, we incubated the cells for 16-hour at 37°C in DMEM containing 400 mM OA and 1% fatty-acid-free FBS and then quantified steatosis. We used 1% fatty-acid-free FBS in all OA treatment experiments to ensure that OA was the single inducer in the medium and that OA did not react with components of FBS. Following steatosis induction, we washed the cells and incubated them for three hours in fresh 1% FBS DMEM containing 400 mM OA solution in the absence or presence of 200 nM Ex-4 (E7144-.1MG, Tocris, Minneapolis, Minnesota). The optimal concentrations of OA and Ex-4 we used were determined in our previous paper [18]. Briefly, Ex-4 concentration was determined by a dose-response experiment. Different concentrations (100 to 600 nM) and times (1h to overnight) were conducted and the best results were obtained with a treatment with 200 nM for 3h. Longer duration of Ex-4 treatment and higher concentration did not improve the outcome likely because Ex-4 is degraded in the culture media after 3 hours. For each experiment, we used a fresh aliquot of Ex-4. Cell viability was checked, and cells demonstrated viability ranging from 80 to 90% in each step of the experiments.

4.3. Quantification of steatosis

As described in our previous studies, the steatosis was quantified by triglyceride measurement [18, 66] using a commercial fluorometric test kit (Abcam TG quantification assay kit, ab65336) and a microplate reader to detect total TGs levels (Infinite F200 Pro; Tecan, Switzerland). We have also used imaging of lipid droplets labeled with BODIPY 493/503, which labels neutral lipids. Finally, we used the mRNA expression of three perilipin proteins that associate with the surface of lipid droplets.

4.4. Total RNA isolation

Total RNA, including miRNAs, was extracted using miRNeasy Mini Kit according to the manufacturer’s instructions. RNA concentrations were assessed using the NanoDropTM spectrophotometer (Thermo Fisher Scientific, Waltham, MA, USA). The RNA samples were immediately frozen at −80 ◦C until use. The RNA quality was assessed using the Agilent RNA 6000 Nano Kit (5067-1511, Agilent, CA, USA) and Agilent 2100 Bioanalyzer (Agilent Technologies) as per the manufacturer's instructions. Our samples RNA integrity number (RIN) ranged from 8.8 to 10, indicating a high degree of RNA integrity. Small RNAs represented 20% of the total RNA, while miRNAs represented 17% of the total small RNAs. We saw no significant changes to these percentages upon treatments with OA and Ex-4.

We used an RNA broad-range assay kit (Q10211, Invitrogen, Carlsbad, CA, USA) and Qubit 2.0 (Thermo Fisher Scientific, Waltham, MA, USA) to measure the RNA concentration and an Agilent RNA 6000 Nano Kit (5067-1511, Agilent, CA, USA) and Agilent 2100 Bioanalyzer (Agilent Technologies, Santa Clara, CA, USA) to assess the RNA quality with, as per the manufacturer’s instructions. RNA concentrations ranged from 266.4 to 1680.8 ng/uL. RNA with a 260/230 nm absorbance ratio of >1.8 and 260/280 nm absorbance ratio >1.8 was used for subsequent experiments on the NanoString nCounter platform.

4.5. NanoString analysis platform and miRNA profiling

Total RNA samples extracted from control and treated cells were analyzed using a highly multiplexed assay to detect specific miRNAs. This test was performed on Nanostring's nCounter (Nanostring Technologies, Seattle, WA, USA) platform using a human V3 miRNA panel that covers 799 highly curated human miRNAs, according to the manufacturer's instructions. Briefly, 100 ng of total RNA was annealed, followed by ligation, and finally by hybridization. Hybridization was performed using reporter and capture probes at 65°C, followed by purification by removing excess probes using the nCounter Prep Station. MiRNAs expression data was generated on nCounter Digital Analyzer. Before data analysis, the assay's technical performance was assessed by checking data quality control using nSolver analysis software. To verify sample integrity, quality, and background, positive and negative proprietary spike-in controls, hybridization controls, and ligation-specific controls were used. Five housekeeping genes (RPLP0, GAPDH, ACTB, RPL19, B2M) were used. In order to normalize ncounter data, the following calculation was used for each sample:Normalized count or miRNA= [raw count of miRNA / Total count of housekeeping genes]*10000. Stringent normalization of miRNA data was achieved by eliminating digital counts below three. A comparison of miRNAs expression between the different groups was performed, and heatmaps and ratio tables with statistically significant differences were generated.

4.6 Quantification reverse transcriptase PCR (qRT-PCR)

For the hsa-miR-122a we used the miScript II RT Kit with HiSpec Buffer (cat. no 218160 , Qiagen, Germantown, MD, USA) to reverse-transcribe 1 μg of RNA into cDNA. q-PCR was performed on the QuantStudio 6 FlexTMTM qPCR (Applied Biosystems USA) using miScript SYBR Green PCR Kit (cat. no 218073, Qiagen, Germantown, MD, USA), and relative levels of hsa-miR-122a was determined from the respective CT values normalized against SNORD95-11 transcript levels.

For miR-4488, miR-651-5p, miR-345, miR-379-5p and miR-1246, miRCURY®LNA® RT kit (Cat. No. 339340, Qiagen, Germantown, MD, USA). The quantitative PCR was performed using miRCURY LNA SYBR Green PCR Kit (200) (Cat. No. 339345, Qiagen, Germantown, MD, USA). Relative expression of miR-4488, miR-651-5p, miR-345, miR-379-5p and miR-1246 were normalized against SNORD48.

4.7 Statistical analyses

We performed all statistical analysis and graphing using GraphPad Prism 9.0 software (GraphPad Prism v9, La Jolla, CA, USA). for q-PCR we used a t-test analysis to evaluate the significance between the mean values of different experimental groups. All values are expressed as the mean ± SE (n = 3). Ns: not significant, * p < 0.05, ** p < 0.01, *** p < 0.001. The experiment was performed in triplicate.

4.8. Functional, Biological Pathway, and statistical analysis

For differential expression of miRNAs (DEmiRs), we used stringent criteria consisting of a fold change (FC) >2 and a false discovery rate (FDR) < 0.05. The significant DEmiRs were subjected to Ingenuity Pathway Analysis (IPA) (QIAGEN Redwood City, CA, USA) to identify specific networks and pathways and STRING (https://string-db.org/; accessed on October 5, 2022) for protein-protein interactions. The Venn diagrams were created using Venny 2.1 (https://bioinfogp.cnb.csic.es/tools/venny/). We performed all statistical analysis using GraphPad Prism 9.0 software (GraphPad Prism v9, La Jolla, CA, USA). A statistically significant difference was considered at p-value ≤ 0.05.

**5. Conclusion**s

In conclusion, our study showed differential expression of various miRNAs between steatotic compared to control cells and between EX-4-treated compared to non-treated steatotic cells. Investigating DEmiRs may help advance our understanding of the mechanisms that underlie the beneficial effect of GLP-1R agonists on NAFLD, providing novel insights into NAFLD pathogenesis and treatment and opening new avenues for drug target discovery. Functional analyses are needed to validate the present observations and better define the role of the DEmiRs in the development of steatosis and the positive effect of GLP-1R agonists on NAFLD. The main limitation of the present study is the use of the HepG2 cell line instead of primary hepatocytes. A full in vivo examination of the DEmiRs and pathways is required in the future to validate the current findings.

**Author Contributions:** AA conceptualized the study. OK induced cell steatosis, performed the quantification of steatosis, optimized the Ex-4 treatment and extracted total RNA,performed the qRT-PCR and analyzed the data. KO performed the NanoString profiling. KE performed the RNAs-eq experiment. N.M.A. analyzed data and edited the manuscript. AA and OK interpreted the data and wrote the manuscript. All the authors reviewed and approved the last version of the manuscript.

**Funding:** This project was funded by an intramural grant from Qatar Biomedical Research Institute.

**Institutional Review Board Statement:** Not applicable

**Informed Consent Statement:** Not applicable

**Data Availability Statement:** All data generated or analyzed during this study are included in this published article or are available from the corresponding author by reasonable request.

**Acknowledgments:** Thanks to Qatar Biomedical Research Institute for funding this research project.

**Conflicts of Interest:** The authors have no conflict of interest to declare.

**Legend to figures**

**Figure 1.** Study design. Samples from control, steatotic and Ex-4 treated cells were collected to extract total RNAs including miRNAs. The matrix for the NanoString technology was produced. To analyze and display the collected data, many bioinformatics tools were employed.

**Figure 2.** Differentially expressed miRNAs between steatotic and control cells. A. Venn diagram showing the distribution of miRNAs affected by steatosis. B. Volcano plot of differentially expressed miRNAs. Single miRNAs are depicted as dots. miRNAs were up-regulated (red) or downregulated (in blue) in steatotic compared to control cells (FC>2 and FDR<0.05). C. List of DEmiRs between steatotic and control cells. D. The hierarchical clustering heatmap of miRNA expression data from the control and steatotic cells based on t-test (p<0.05) (n=4 for each condition). The miRNAs species are shown on the right. The heatmap is based on normalized miRNA expression values from each dataset. The dendrogram shows significantly different expression levels of miRNAs among samples. Brown and blue indicate high and low expression, respectively.

**Figure 3.** Chemometric analysis of miRNAs data set from steatotic compared to control samples, and Ex-4-treated to steatotic samples. A. PCA score plot between steatotic and control samples. B. PLS-DA score plot between steatotic and control samples. C. Important features (VIP scores) identified by PLS-DA between steatotic and control samples. The colored boxes on the right indicate the relative levels of the corresponding element in control (1) and steatotic (2) cells. The colored oval shapes in A and B indicate the 95% confidence regions. D. PCA score plot between Ex-4-treated and steatotic samples. E. PLS-DA score plot between Ex-4-treated and steatotic samples. (F) Important features (VIP scores) identified by PLS-DA between Ex-4-treated and steatotic samples. The colored boxes on the right indicate the relative levels of the corresponding element in Ex-4-treated (3) and steatotic (2) cells. The colored oval shapes in D and E indicate the 95% confidence regions.

**Figure 4.** miRNA-mRNA interaction and enriched canonical pathways (CP) (A, B, E, and F) and diseases and functions (Fx) (C, D, G and H) using differentially expressed miRNAs between control cells compared to steatotic cells (A, B, C and D) and Ex-4-treated compared to steatotic samples (E, F, G and H). The canonical pathways involve at least one protein (blue (downregulated) and red (up-regulated) boxes) and one miRNA (orange (up-regulated) and (green (downregulated) boxes). The black arrows indicate link between miRNAs and their target proteins, while the red arrows indicate relationship between proteins and canonical pathways or cellular functions.

**Figure 5.** Differentially expressed miRNAs between Ex-4-treated and steatotic cells. A. Venn diagram showing the distribution of miRNAs affected by Ex-4 treatment. B. Volcano plot of differentially expressed miRNAs. Single miRNAs are depicted as dots. miRNAs were up-regulated (red) or downregulated (in blue) in Ex-4-treated compared to steatotic cells (FC>2 and FDR<0.05). C. List of DEmiRs between steatotic and control cells. D. Heatmap of miRNA expression data from the Ex-4-treated and steatotic cells. Only the top 25 miRNAs are shown (n=4 for each condition). The miRNAs species are shown on the right. The heatmap is based on normalized miRNA expression values from each dataset. The dendrogram shows significantly different expression levels of miRNAs among samples. Brown and bleu indicate, respectively, high, and low expression.

**Figure 6.** Functional enrichment analysis of mRNA that could be associated with miRNAs dysregulated in Ex-4 treated cells versus steatotic cells.A. The protein-protein interaction (PPI) network generated for the 34 gene targets of the identified DEmiRs between Ex-4 treated and steatotic cells. Network nodes represent proteins, while edges depict protein-protein associations. The key network statistics are also presented. B. The top 10 functional enrichment annotations from Gene Ontology (GO) Biological Process are listed. STRING DataBase 11.5 was used for data analysis.

**Figure 7 :** Validation of the differential expression of a set of miRNAs with qRT-PCR. Comparison of the expression of miR-122, miR- 4488, miR-651, miR-345, miR-379, and miR-1246 between steatotic cells and Ex-4-treated steatotic cells using qRT-PCR and Nanostring. The experiment was performed in triplicate.

**References**

1. Perumpail, B.J., et al., *Clinical epidemiology and disease burden of nonalcoholic fatty liver disease.* World J Gastroenterol, 2017. **23**(47): p. 8263-8276.

2. Pouwels, S., et al., *Non-alcoholic fatty liver disease (NAFLD): a review of pathophysiology, clinical management and effects of weight loss.* BMC Endocr Disord, 2022. **22**(1): p. 63.

3. Vieira Barbosa, J. and M. Lai, *Nonalcoholic Fatty Liver Disease Screening in Type 2 Diabetes Mellitus Patients in the Primary Care Setting.* Hepatol Commun, 2021. **5**(2): p. 158-167.

4. Kitade, H., et al., *Nonalcoholic Fatty Liver Disease and Insulin Resistance: New Insights and Potential New Treatments.* Nutrients, 2017. **9**(4).

5. Noureddin, M., et al., *NASH Leading Cause of Liver Transplant in Women: Updated Analysis of Indications For Liver Transplant and Ethnic and Gender Variances.* Am J Gastroenterol, 2018. **113**(11): p. 1649-1659.

6. Francque, S.M., et al., *Non-alcoholic fatty liver disease: A patient guideline.* JHEP Rep, 2021. **3**(5): p. 100322.

7. Shaker, M., et al., *Liver transplantation for nonalcoholic fatty liver disease: new challenges and new opportunities.* World J Gastroenterol, 2014. **20**(18): p. 5320-30.

8. Pais, R., et al., *NAFLD and liver transplantation: Current burden and expected challenges.* J Hepatol, 2016. **65**(6): p. 1245-1257.

9. Lazarus, J.V., et al., *Advancing the global public health agenda for NAFLD: a consensus statement.* Nat Rev Gastroenterol Hepatol, 2022. **19**(1): p. 60-78.

10. Yoo, E.R., et al., *When to Initiate Weight Loss Medications in the NAFLD Population.* Diseases, 2018. **6**(4).

11. Hsu, C.C., E. Ness, and K.V. Kowdley, *Nutritional Approaches to Achieve Weight Loss in Nonalcoholic Fatty Liver Disease.* Adv Nutr, 2017. **8**(2): p. 253-265.

12. Mantovani, A. and A. Dalbeni, *Treatments for NAFLD: State of Art.* Int J Mol Sci, 2021. **22**(5).

13. van der Windt, D.J., et al., *The Effects of Physical Exercise on Fatty Liver Disease.* Gene Expr, 2018. **18**(2): p. 89-101.

14. Hung, C.K. and H.C. Bodenheimer, Jr., *Current Treatment of Nonalcoholic Fatty Liver Disease/Nonalcoholic Steatohepatitis.* Clin Liver Dis, 2018. **22**(1): p. 175-187.

15. Vilar-Gomez, E., et al., *Weight Loss Through Lifestyle Modification Significantly Reduces Features of Nonalcoholic Steatohepatitis.* Gastroenterology, 2015. **149**(2): p. 367-78.e5; quiz e14-5.

16. Brunner, K.T., et al., *Nonalcoholic Fatty Liver Disease and Obesity Treatment.* Curr Obes Rep, 2019. **8**(3): p. 220-228.

17. Nauck, M.A., et al., *GLP-1 receptor agonists in the treatment of type 2 diabetes - state-of-the-art.* Mol Metab, 2021. **46**: p. 101102.

18. Khalifa, O., et al., *Exendin-4 alleviates steatosis in an in vitro cell model by lowering FABP1 and FOXA1 expression via the Wnt/-catenin signaling pathway.* Sci Rep, 2022. **12**(1): p. 2226.

19. Zhang, F., et al., *Recombinant human GLP-1 beinaglutide regulates lipid metabolism of adipose tissues in diet-induced obese mice.* iScience, 2021. **24**(12): p. 103382.

20. Lee, R.C., R.L. Feinbaum, and V. Ambros, *The C. elegans heterochronic gene lin-4 encodes small RNAs with antisense complementarity to lin-14.* Cell, 1993. **75**(5): p. 843-54.

21. Smith-Vikos, T. and F.J. Slack, *MicroRNAs and their roles in aging.* J Cell Sci, 2012. **125**(Pt 1): p. 7-17.

22. Aryal, B., et al., *MicroRNAs and lipid metabolism.* Curr Opin Lipidol, 2017. **28**(3): p. 273-280.

23. Fang, Z., G. Dou, and L. Wang, *MicroRNAs in the Pathogenesis of Nonalcoholic Fatty Liver Disease.* Int J Biol Sci, 2021. **17**(7): p. 1851-1863.

24. Leti, F., et al., *High-throughput sequencing reveals altered expression of hepatic microRNAs in nonalcoholic fatty liver disease-related fibrosis.* Transl Res, 2015. **166**(3): p. 304-14.

25. Di Mauro, S., et al., *Intracellular and extracellular miRNome deregulation in cellular models of NAFLD or NASH: Clinical implications.* Nutr Metab Cardiovasc Dis, 2016. **26**(12): p. 1129-1139.

26. Okamoto, K., et al., *A Series of microRNA in the Chromosome 14q32.2 Maternally Imprinted Region Related to Progression of Non-Alcoholic Fatty Liver Disease in a Mouse Model.* PLoS One, 2016. **11**(5): p. e0154676.

27. Okamoto, Y., S. Tanaka, and Y. Haga, *Enhanced GLUT2 gene expression in an oleic acid-induced in vitro fatty liver model.* Hepatol Res, 2002. **23**(2): p. 138-144.

28. Errafii, K., et al., *Comparative Transcriptome Analysis Reveals That Exendin-4 Improves Steatosis in HepG2 Cells by Modulating Signaling Pathways Related to Lipid Metabolism.* Biomedicines, 2022. **10**(5).

29. Khalifa, O., et al., *Investigation of the Effect of Exendin-4 on Oleic Acid-Induced Steatosis in HepG2 Cells Using Fourier Transform Infrared Spectroscopy.* Biomedicines, 2022. **10**(10).

30. Szklarczyk, D., et al., *The STRING database in 2021: customizable protein-protein networks, and functional characterization of user-uploaded gene/measurement sets.* Nucleic Acids Res, 2021. **49**(D1): p. D605-d612.

31. Sarwar, R., N. Pierce, and S. Koppe, *Obesity and nonalcoholic fatty liver disease: current perspectives.* Diabetes Metab Syndr Obes, 2018. **11**: p. 533-542.

32. Seghieri, M., et al., *Future Perspectives on GLP-1 Receptor Agonists and GLP-1/glucagon Receptor Co-agonists in the Treatment of NAFLD.* Front Endocrinol (Lausanne), 2018. **9**: p. 649.

33. Wong, C., et al., *Glucagon-Like Peptide-1 Receptor Agonists for Non-Alcoholic Fatty Liver Disease in Type 2 Diabetes: A Meta-Analysis.* Front Endocrinol (Lausanne), 2021. **12**: p. 609110.

34. Patel Chavez, C., K. Cusi, and S. Kadiyala, *The Emerging Role of Glucagon-like Peptide-1 Receptor Agonists for the Management of NAFLD.* J Clin Endocrinol Metab, 2022. **107**(1): p. 29-38.

35. Dougherty, J.A., E. Guirguis, and K.A. Thornby, *A Systematic Review of Newer Antidiabetic Agents in the Treatment of Nonalcoholic Fatty Liver Disease.* Ann Pharmacother, 2021. **55**(1): p. 65-79.

36. Zafar, Y., et al., *Effect of novel glucose lowering agents on non-alcoholic fatty liver disease: A systematic review and meta-analysis.* Clin Res Hepatol Gastroenterol, 2022. **46**(7): p. 101970.

37. Rowlands, J., et al., *Pleiotropic Effects of GLP-1 and Analogs on Cell Signaling, Metabolism, and Function.* Front Endocrinol (Lausanne), 2018. **9**: p. 672.

38. Gupta, N.A., et al., *Glucagon-like peptide-1 receptor is present on human hepatocytes and has a direct role in decreasing hepatic steatosis in vitro by modulating elements of the insulin signaling pathway.* Hepatology, 2010. **51**(5): p. 1584-92.

39. Yokomori, H. and W. Ando, *Spatial expression of glucagon-like peptide 1 receptor and caveolin-1 in hepatocytes with macrovesicular steatosis in non-alcoholic steatohepatitis.* BMJ Open Gastroenterol, 2020. **7**(1).

40. Körner, M., et al., *GLP-1 receptor expression in human tumors and human normal tissues: potential for in vivo targeting.* J Nucl Med, 2007. **48**(5): p. 736-43.

41. López-Pastor, A.R., et al., *miRNA Dysregulation in the Development of Non-Alcoholic Fatty Liver Disease and the Related Disorders Type 2 Diabetes Mellitus and Cardiovascular Disease.* Front Med (Lausanne), 2020. **7**: p. 527059.

42. Lin, H.Y., et al., *The Emerging Role of MicroRNAs in NAFLD: Highlight of MicroRNA-29a in Modulating Oxidative Stress, Inflammation, and Beyond.* Cells, 2020. **9**(4).

43. Gjorgjieva, M., et al., *miRNAs and NAFLD: from pathophysiology to therapy.* Gut, 2019. **68**(11): p. 2065-2079.

44. Kazeminasab, F., M. Baharlooie, and K. Ghaedi, *Noncoding RNAs Associated with PPARs in Etiology of MAFLD as a Novel Approach for Therapeutics Targets.* PPAR Res, 2022. **2022**: p. 6161694.

45. Jansson, M.D. and A.H. Lund, *MicroRNA and cancer.* Mol Oncol, 2012. **6**(6): p. 590-610.

46. Khalifa, O., et al., *Noncoding RNAs in Nonalcoholic Fatty Liver Disease: Potential Diagnosis and Prognosis Biomarkers.* Dis Markers, 2020. **2020**: p. 8822859.

47. Long, J.K., et al., *miR-122 promotes hepatic lipogenesis via inhibiting the LKB1/AMPK pathway by targeting Sirt1 in non-alcoholic fatty liver disease.* Mol Med, 2019. **25**(1): p. 26.

48. Inomata, Y., et al., *Downregulation of miR-122-5p Activates Glycolysis via PKM2 in Kupffer Cells of Rat and Mouse Models of Non-Alcoholic Steatohepatitis.* Int J Mol Sci, 2022. **23**(9).

49. Hu, Y., et al., *MicroRNA-122-5p Inhibition Improves Inflammation and Oxidative Stress Damage in Dietary-Induced Non-alcoholic Fatty Liver Disease Through Targeting FOXO3.* Front Physiol, 2022. **13**: p. 803445.

50. Yamada, H., et al., *Associations between circulating microRNAs (miR-21, miR-34a, miR-122 and miR-451) and non-alcoholic fatty liver.* Clin Chim Acta, 2013. **424**: p. 99-103.

51. Nakao, K., H. Miyaaki, and T. Ichikawa, *Antitumor function of microRNA-122 against hepatocellular carcinoma.* Journal of gastroenterology, 2014. **49**(4): p. 589-593.

52. Lin, C.J., et al., *Complements are involved in alcoholic fatty liver disease, hepatitis and fibrosis.* World J Hepatol, 2018. **10**(10): p. 662-669.

53. Wang, P., et al., *miR-345-5p curbs hepatic stellate cell activation and liver fibrosis progression by suppressing hypoxia-inducible factor-1alpha expression.* Toxicol Lett, 2022. **370**: p. 42-52.

54. Feng, J., et al., *mTOR: A Potential New Target in Nonalcoholic Fatty Liver Disease.* Int J Mol Sci, 2022. **23**(16).

55. Arora, M., N. Kutinová Canová, and H. Farghali, *mTOR as an eligible molecular target for possible pharmacological treatment of nonalcoholic steatohepatitis.* Eur J Pharmacol, 2022. **921**: p. 174857.

56. Mesarwi, O.A., et al., *Hepatocyte Hypoxia Inducible Factor-1 Mediates the Development of Liver Fibrosis in a Mouse Model of Nonalcoholic Fatty Liver Disease.* PLoS One, 2016. **11**(12): p. e0168572.

57. Han, J., et al., *Hypoxia inducible factor-1 promotes liver fibrosis in nonalcoholic fatty liver disease by activating PTEN/p65 signaling pathway.* J Cell Biochem, 2019. **120**(9): p. 14735-14744.

58. Holzner, L.M.W. and A.J. Murray, *Hypoxia-Inducible Factors as Key Players in the Pathogenesis of Non-alcoholic Fatty Liver Disease and Non-alcoholic Steatohepatitis.* Front Med (Lausanne), 2021. **8**: p. 753268.

59. Okamoto, K., et al., *Serum miR-379 expression is related to the development and progression of hypercholesterolemia in non-alcoholic fatty liver disease.* PLoS One, 2020. **15**(2): p. e0219412.

60. de Guia, R.M., et al., *microRNA-379 couples glucocorticoid hormones to dysfunctional lipid homeostasis.* Embo j, 2015. **34**(3): p. 344-60.

61. Cao, C., et al., *Lack of miR-379/miR-544 Cluster Resists High-Fat Diet-Induced Obesity and Prevents Hepatic Triglyceride Accumulation in Mice.* Front Cell Dev Biol, 2021. **9**: p. 720900.

62. Dong, Y., et al., *MicroRNA-379-5p regulates free cholesterol accumulation and relieves diet induced-liver damage in db/db mice via STAT1/HMGCS1 axis.* Mol Biomed, 2022. **3**(1): p. 25.

63. Wang, C.H., et al., *Losartan Prevents Hepatic Steatosis and Macrophage Polarization by Inhibiting HIF-1α in a Murine Model of NAFLD.* Int J Mol Sci, 2021. **22**(15).

64. Mesarwi, O.A., et al., *Hepatocyte HIF-1 and Intermittent Hypoxia Independently Impact Liver Fibrosis in Murine Nonalcoholic Fatty Liver Disease.* Am J Respir Cell Mol Biol, 2021. **65**(4): p. 390-402.

65. He, Y., et al., *Silencing HIF-1α aggravates non-alcoholic fatty liver disease in vitro through inhibiting PPAR-α/ANGPTL4 singling pathway.* Gastroenterol Hepatol, 2021. **44**(5): p. 355-365.

66. Seo, M.H., et al., *Exendin-4 Inhibits Hepatic Lipogenesis by Increasing β-Catenin Signaling.* PLoS One, 2016. **11**(12): p. e0166913.

67. Meyer, G., et al., *A potential role of progestin-induced laminin-5/α6-integrin signaling in the formation of side branches in the mammary gland.* Endocrinology, 2012. **153**(10): p. 4990-5001.

68. Nair, B. and L.R. Nath, *Inevitable role of TGF-β1 in progression of nonalcoholic fatty liver disease.* J Recept Signal Transduct Res, 2020. **40**(3): p. 195-200.

69. Fougerat, A., et al., *Peroxisome Proliferator-Activated Receptors and Their Novel Ligands as Candidates for the Treatment of Non-Alcoholic Fatty Liver Disease.* Cells, 2020. **9**(7).

70. Hardwick, J.P., et al., *PPAR/RXR Regulation of Fatty Acid Metabolism and Fatty Acid omega-Hydroxylase (CYP4) Isozymes: Implications for Prevention of Lipotoxicity in Fatty Liver Disease.* PPAR Res, 2009. **2009**: p. 952734.

71. Daniel, P.V., et al., *NF-κB p65 regulates hepatic lipogenesis by promoting nuclear entry of ChREBP in response to a high carbohydrate diet.* J Biol Chem, 2021. **296**: p. 100714.

72. Dongiovanni, P., et al., *Genetic variants regulating insulin receptor signalling are associated with the severity of liver damage in patients with non-alcoholic fatty liver disease.* Gut, 2010. **59**(2): p. 267-73.

73. Matsuda, S., M. Kobayashi, and Y. Kitagishi, *Roles for PI3K/AKT/PTEN Pathway in Cell Signaling of Nonalcoholic Fatty Liver Disease.* ISRN Endocrinol, 2013. **2013**: p. 472432.

74. Yang, P., et al., *Liraglutide ameliorates nonalcoholic fatty liver disease in diabetic mice via the IRS2/PI3K/Akt signaling pathway.* Diabetes Metab Syndr Obes, 2019. **12**: p. 1013-1021.

75. Vinciguerra, M., et al., *PTEN down-regulation by unsaturated fatty acids triggers hepatic steatosis via an NF-kappaBp65/mTOR-dependent mechanism.* Gastroenterology, 2008. **134**(1): p. 268-80.

76. Dattaroy, D., et al., *Micro-RNA 21 inhibition of SMAD7 enhances fibrogenesis via leptin-mediated NADPH oxidase in experimental and human nonalcoholic steatohepatitis.* Am J Physiol Gastrointest Liver Physiol, 2015. **308**(4): p. G298-312.

77. Wree, A., et al., *NLRP3 inflammasome activation results in hepatocyte pyroptosis, liver inflammation, and fibrosis in mice.* Hepatology, 2014. **59**(3): p. 898-910.

78. Hernandez-Gea, V. and S.L. Friedman, *Pathogenesis of liver fibrosis.* Annu Rev Pathol, 2011. **6**: p. 425-56.

79. Miura, K., et al., *Hepatic recruitment of macrophages promotes nonalcoholic steatohepatitis through CCR2.* Am J Physiol Gastrointest Liver Physiol, 2012. **302**(11): p. G1310-21.

80. Marra, F. and G. Svegliati-Baroni, *Lipotoxicity and the gut-liver axis in NASH pathogenesis.* J Hepatol, 2018. **68**(2): p. 280-295.

81. Alkhatatbeh, M.J., L.F. Lincz, and R.F. Thorne, *Low simvastatin concentrations reduce oleic acid-induced steatosis in HepG(2) cells: An in vitro model of non-alcoholic fatty liver disease.* Exp Ther Med, 2016. **11**(4): p. 1487-1492.
